# Supplementary material
Source: PubMed Central journal article supplement (PMC4242426)

# Supporting Information

## Development of a Concise Synthetic Approach to Access Oroxin A

Haijun Chen<sup>a,\*</sup>, Guihua He<sup>a</sup>, Cailong Li<sup>a</sup>, Longrong Dong<sup>a</sup>, Xiaobo Xie<sup>a</sup>, Jianlei Wu<sup>a</sup>,

Yu Gao<sup>a</sup>, Jia Zhou<sup>b,\*</sup>

<sup>a</sup>College of Chemistry, Fuzhou University, Fuzhou, Fujian 350108, China

<sup>b</sup>Chemical Biology Program, Department of Pharmacology and Toxicology,

University of Texas Medical Branch, Galveston, Texas 77555, United States

Corresponding authors:

\*Haijun Chen, PhD

College of Chemistry

Fuzhou University

Fuzhou, Fujian 350108, China

Email: [chenhaij@gmail.com](mailto:chenhaij@gmail.com)

\*Jia Zhou, PhD

Chemical Biology Program

Department of Pharmacology and Toxicology

University of Texas Medical Branch

Galveston, Texas 77555, United States

Email: [jizhou@utmb.edu](mailto:jizhou@utmb.edu)

### Table of Contents

1. Experimental section S2
2. Copies of <sup>1</sup>H and <sup>13</sup>C NMR spectra of Oroxin A S3

## 1. Experimental section

**General:** All commercially available starting materials and solvents were reagent grade, and used without further purification. Reactions were performed under a nitrogen atmosphere in dry glassware with magnetic stirring. Preparative column chromatography was performed using silica gel 60, particle size 0.063-0.200 mm (70-230 mesh, flash). Analytical TLC was carried out employing silica gel 60 F254 plates (Merck, Darmstadt). Visualization of the developed chromatograms was performed with detection by UV (254 nm). NMR spectra were recorded on a Bruker-400 ( $^1\text{H}$ , 400 MHz;  $^{13}\text{C}$ , 100 MHz) spectrometer.  $^1\text{H}$  and  $^{13}\text{C}$  NMR spectra were recorded with TMS as an internal reference. Chemical shifts were expressed in ppm, and  $J$  values were given in Hz. Melting point was determined using the X-4 melting point apparatus (Bei Jing Taike Co., Ltd.) and uncorrected. High-resolution mass spectra (HRMS) were obtained from Thermo Fisher Scientific Exactive Plus mass spectrometer.

## 2. Copies of $^1\text{H}$ and $^{13}\text{C}$ NMR spectra of Oroxin A

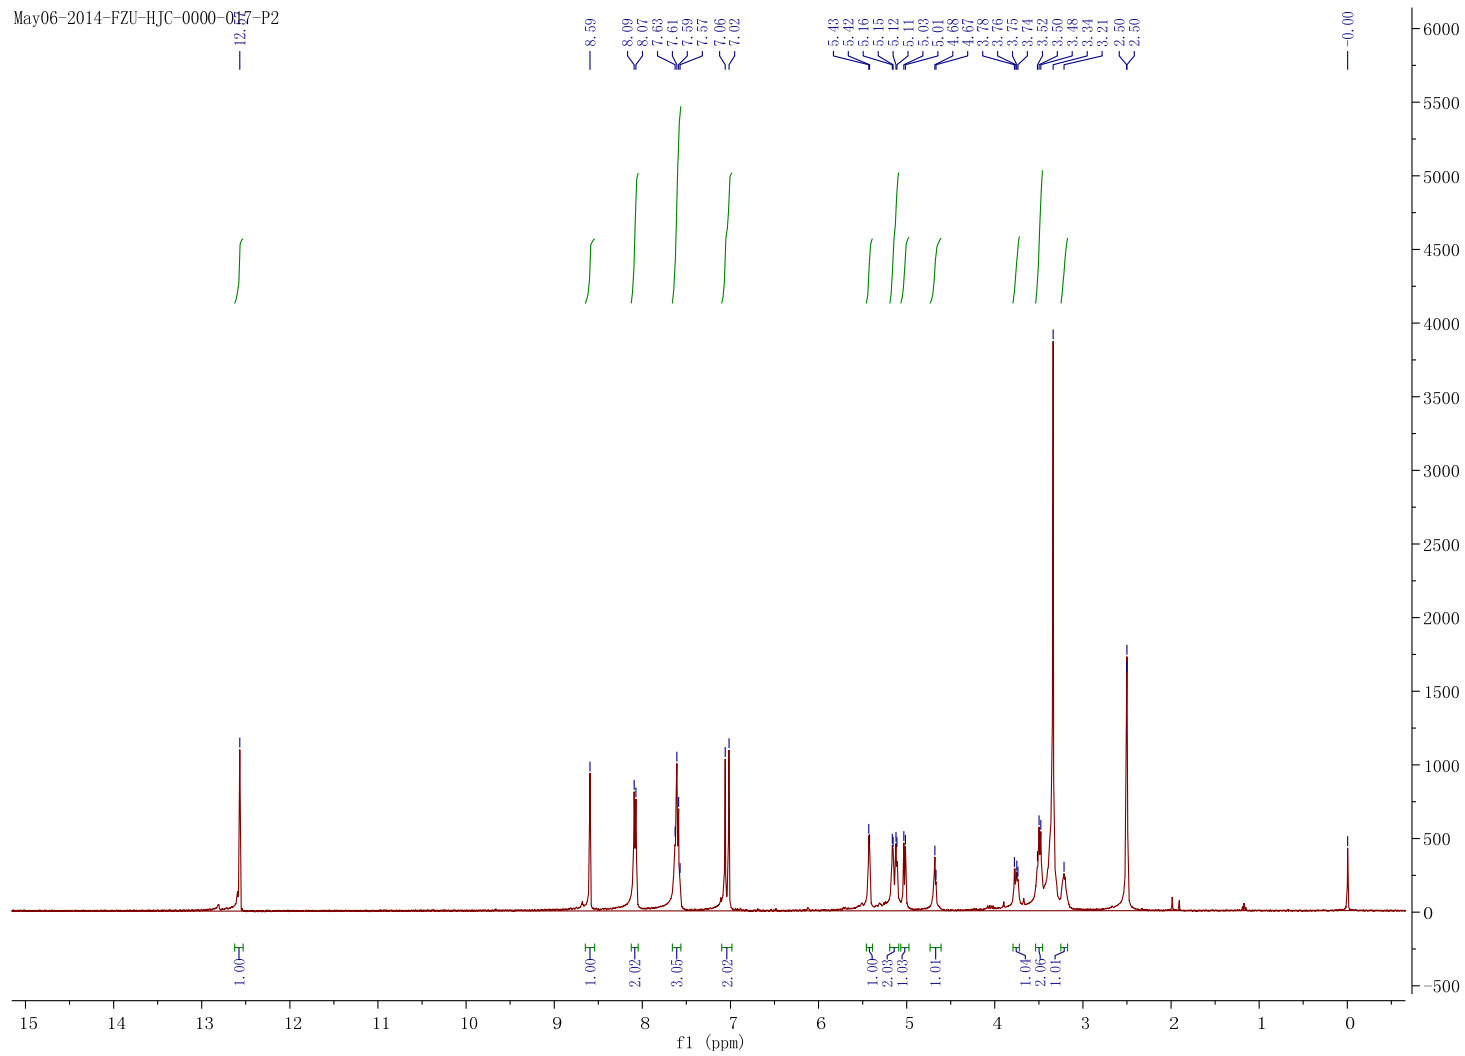

May27-2014-FZU-HJC-00004917-P2

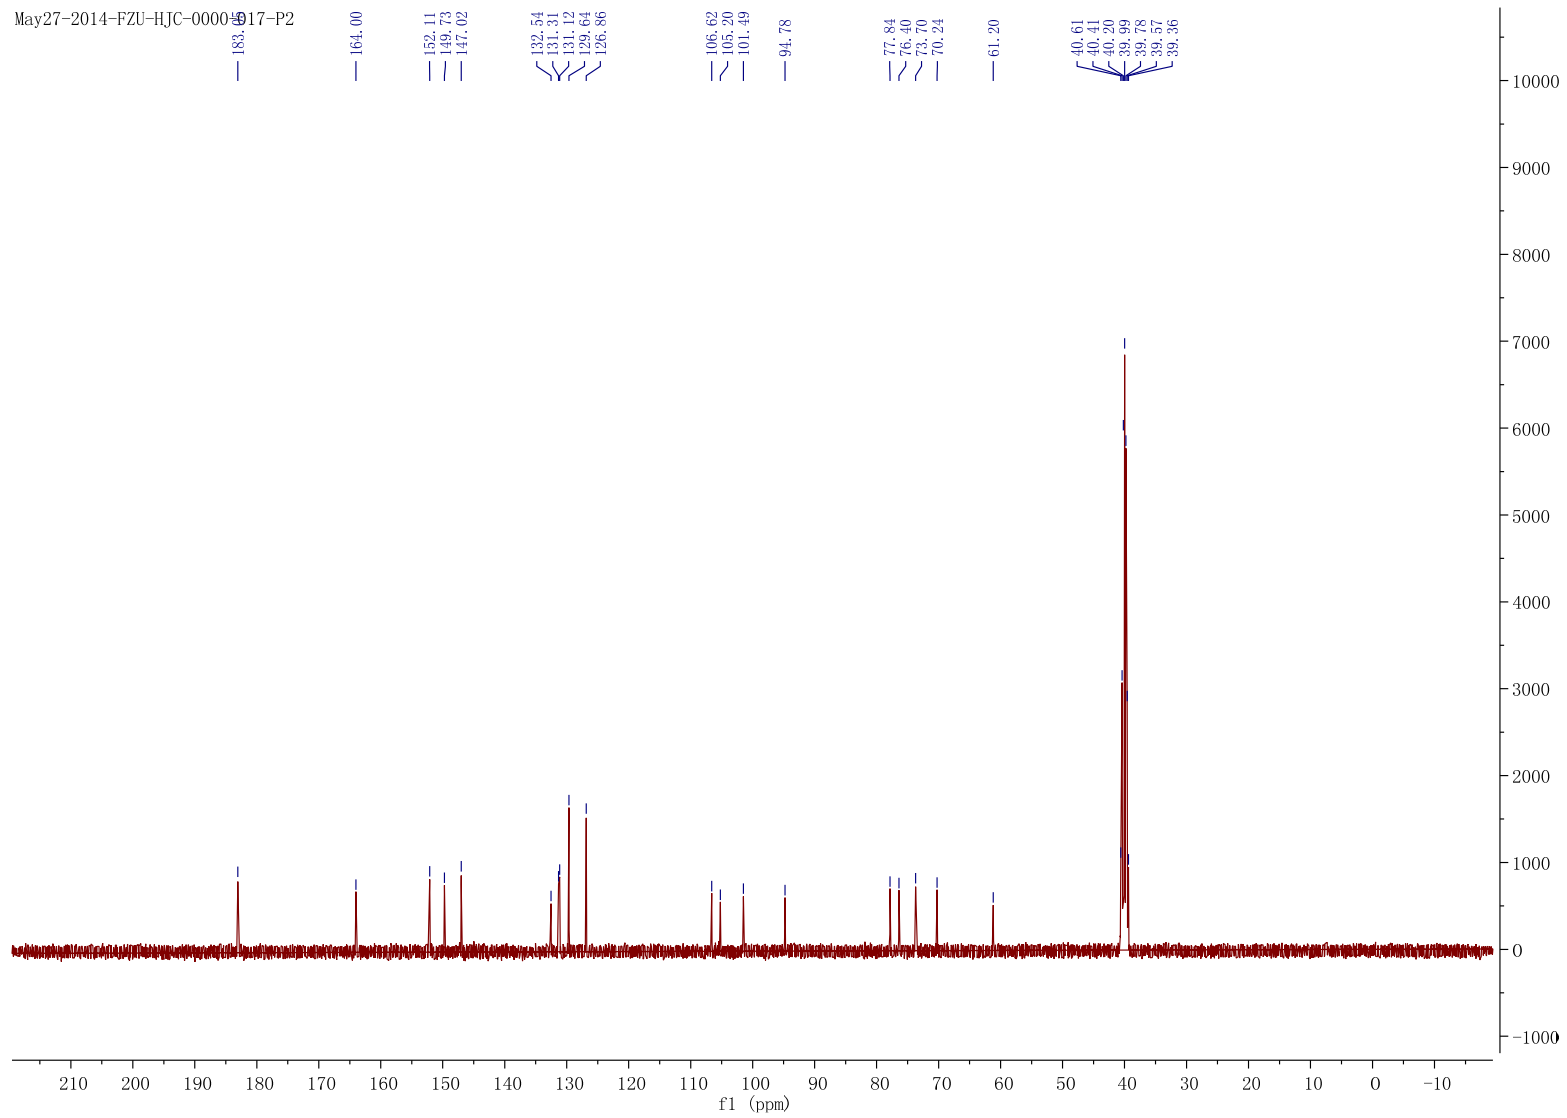

# <sup>1</sup>H NMR spectra of Synthetic Oroxin A

May06-2014-FZU-HJC-0000-017-P2

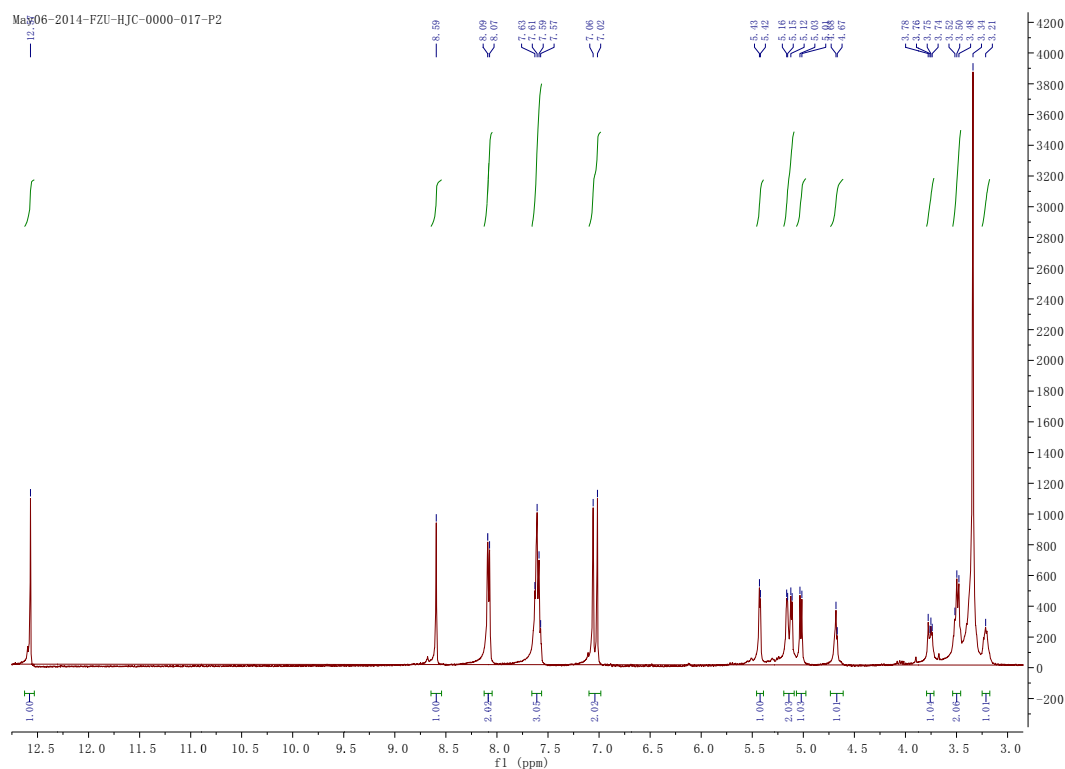

# <sup>1</sup>H NMR spectra from *Process Biochem.*, **2013**, *48*, 1744-1748.

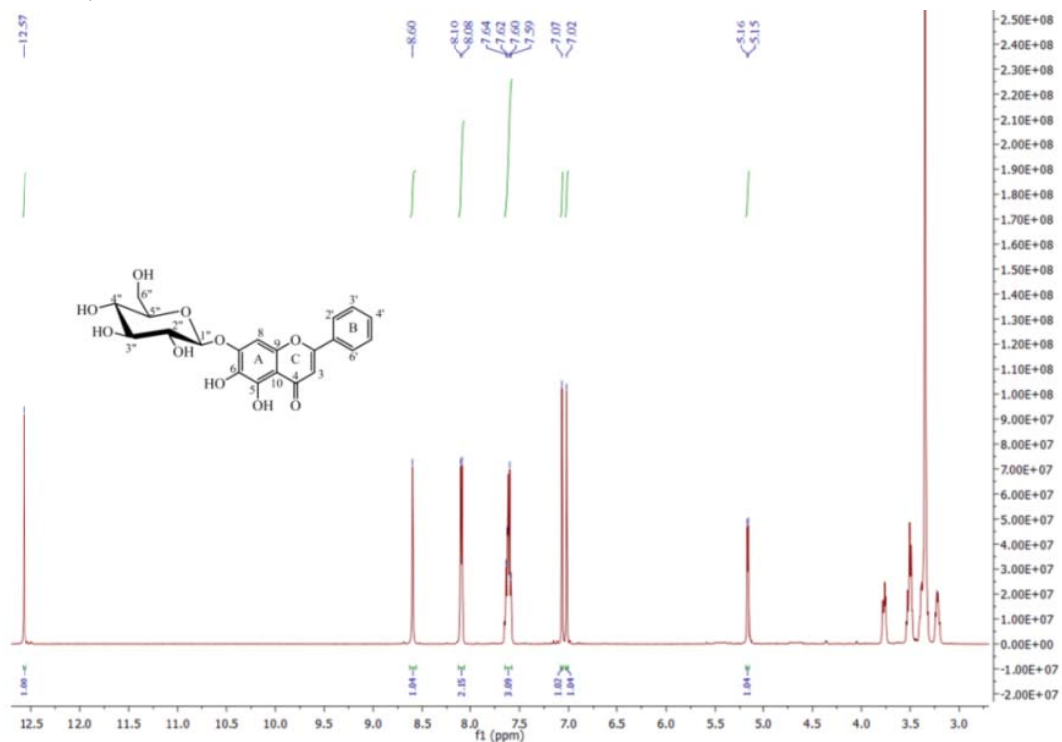

# <sup>1</sup>H NMR spectra of Synthetic Oroxin A (Part 1)

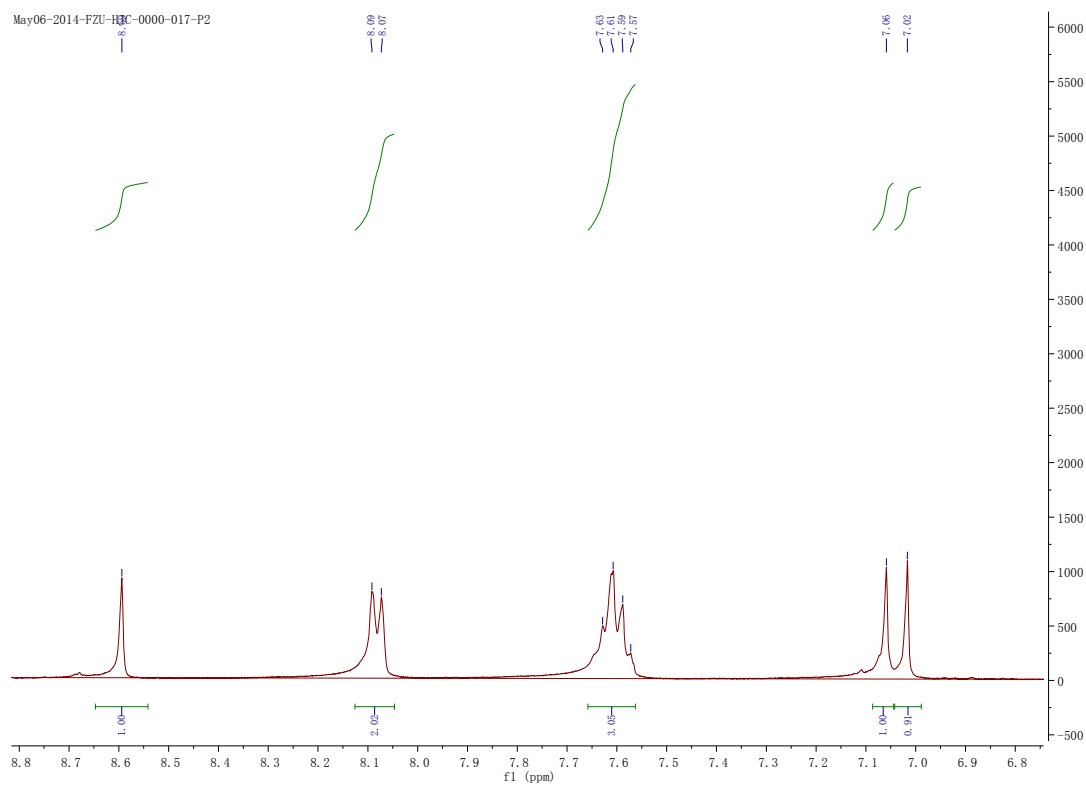

# <sup>1</sup>H NMR spectra of Synthetic Oroxin A (Part 2, contains the signals of OH/glucoside)

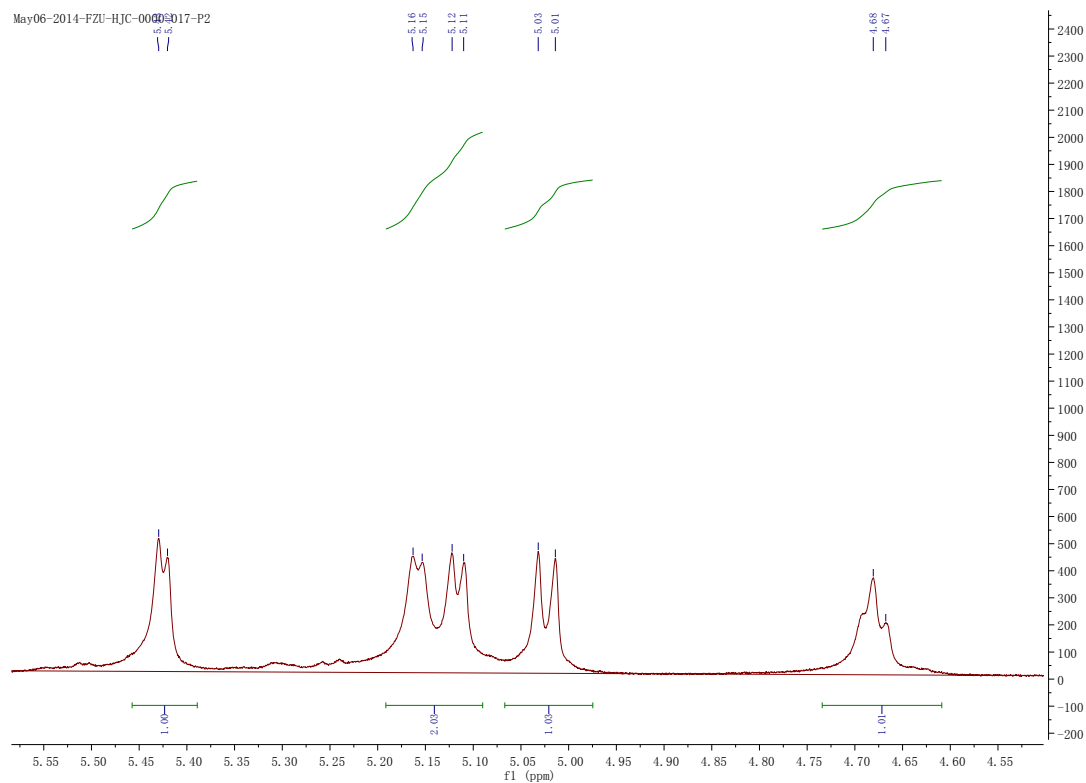

# <sup>1</sup>H NMR spectra of Synthetic Oroxin A (Part 3)

May06-2014-FZU-HJC#000-017-P2

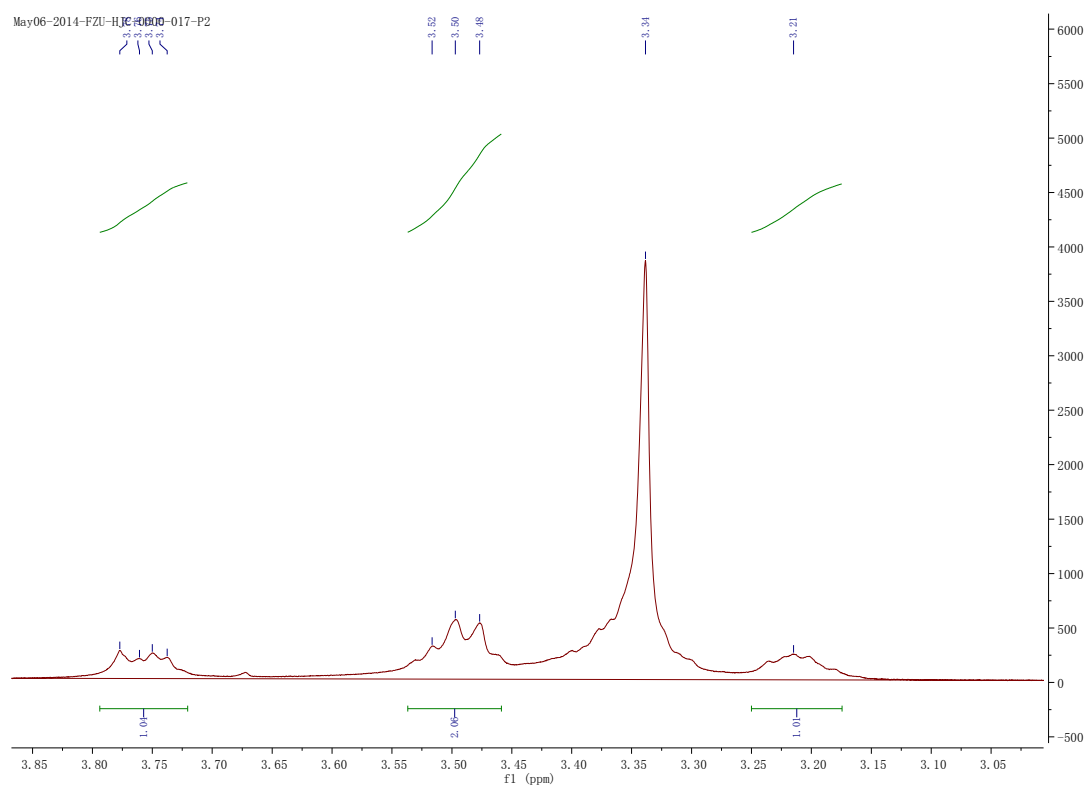

### <sup>13</sup>C NMR spectra of Synthetic Oroxin A

May 27-2014-FZU-HJC-0000-017-P2

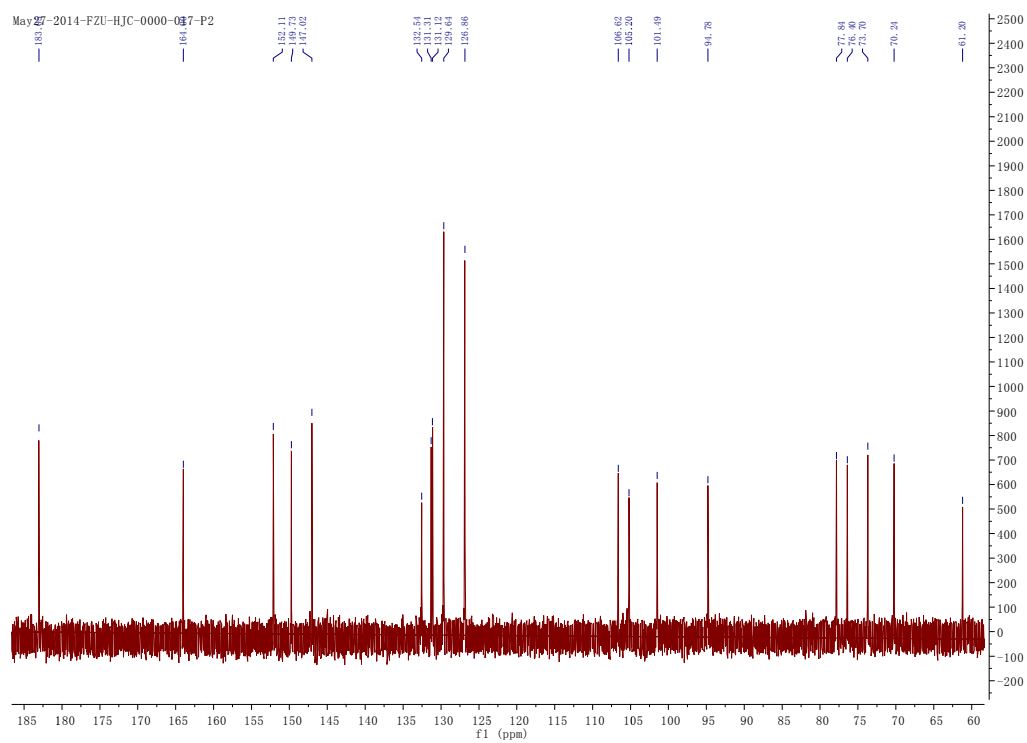

### <sup>13</sup>C NMR spectra from *Process Biochem.*, 2013, 48, 1744-1748.

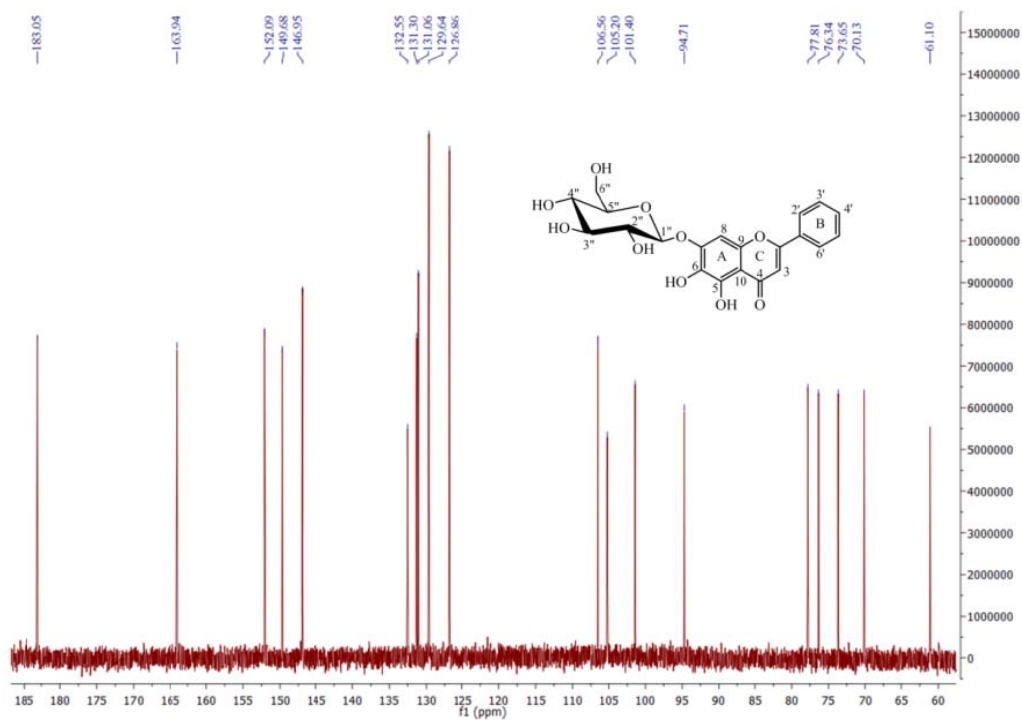

Supplement: NIHMS629873-supplement-Supplementary_Information.pdf [file NIHMS629873-supplement-Supplementary_Information.pdf]
